# Supplementary material
Source: HighWire-hosted journal article supplement (https://www.cmajopen.ca/highwire/filestream/87301/field_highwire_adjunct_files/0/2021-0013-1-at.pdf)
Supplement: 2021-0013-1-at.pdf [file 2021-0013-1-at.pdf]

## Appendix 1. Interview guide for family physicians

### About you

1. Could you please tell me a little bit about yourself and your practice?

### About early diagnosis of cancer

2. From your perspective, what is the role of family physicians in diagnosing cancer as early as possible? What is the role of cancer specialists in diagnosing cancer as early as possible?
3. Can you please help me understand how you generally proceed when a patient presents to you with signs/symptoms that might be related to cancer?
4. Once patients present to you with signs/symptoms, what challenges have you faced in getting to a cancer diagnosis as quickly as possible? What things influence the time it takes to get to that diagnosis?

### Expediting the diagnostic process

5. In your experience, what are some facilitators or enablers of making a cancer diagnosis as early as possible?
6. Given your experience, what are some opportunities for streamlining the pathways in Alberta from the time a patient presents to a family physician to diagnosis of cancer?

### Improving patient and family experiences

- 7.** We know from a previous study that the diagnostic period can be a time of high anxiety for patients and families. What, in your opinion, could be done to better support them during this period?

Anything else?

- 8.** Is there anything else you wish to say?

Thank you
